# Supplementary material for: Lung Ultrasound Improves Outcome Prediction over Clinical Judgment in COVID-19 Patients Evaluated in the Emergency Department
Source: J Clin Med. 2022 May 27;11(11):3032. doi: 10.3390/jcm11113032 (PMC9181775; doi:10.3390/jcm11113032)
Supplement: Supplementary file 1 [file jcm-11-03032-s001.zip › jcm-1681803-supplementary.pdf]

# **Lung Ultrasound Improves Outcome Prediction over Clinical Judgment in COVID-19**

## **Patients Evaluated in the Emergency Department**

### **Supplementary Materials**

#### **CODED Study Investigators not included in the author list:**

Arianna Ardito <sup>1</sup>, Gilberto Calzolari <sup>1</sup>, Dario Leone <sup>1</sup>, Stefania Locatelli <sup>1</sup>, Monica Masoero <sup>1</sup>, Maria Tizzani <sup>1</sup>, Andrea Viola <sup>1</sup>, Margherita Calicchia <sup>1,2</sup>, Ilenia Carretto <sup>1,2</sup>, Maria Gelardi <sup>1,2</sup>, Eleonora Dipietro <sup>1,2</sup>, Matteo Oddi <sup>1,2</sup>, Virginia Scategni <sup>1,2</sup>, Astrid Cecilia Surra <sup>1,2</sup>, Gabriele Cerini <sup>3</sup>, Carolina Pelliccioni <sup>3</sup> and Alessandra Ricciardolo <sup>3</sup>.

#### **Affiliations:**

1. S.C. Medicina d'Urgenza U, Ospedale Molinette, A.O.U. Città della Salute e della Scienza di Torino, 10126 Torino, Italy
2. Scuola di Specializzazione in Medicina d'Emergenza-Urgenza, Università degli Studi di Torino, 10126 Torino, Italy
3. Medicina e Chirurgia di Urgenza e Accettazione, A.O.U. Careggi, 50134 Firenze, Italy

**Supplementary Table S1.** Variables in the HOME-CoV rule, adapted from Duillet D. et al. [7]. Presence of one or more criteria corresponds to a POSITIVE HOME-CoV rule.

| Clinical Variable                                                             |
|-------------------------------------------------------------------------------|
| Pulse oxygen saturation $\leq 94\%$ in ambient air                            |
| Respiratory rate $\geq 25/\text{min}$                                         |
| Ability to talk without breathing $< 8$ sec.                                  |
| Systolic blood pressure $\leq 90$ mmHg                                        |
| Heart rate $\geq 120$ beats/min                                               |
| Confusion or impaired consciousness                                           |
| Severe comorbidity <sup>a</sup> and inadequate living conditions <sup>b</sup> |

A: Severe chronic respiratory disease (unstable asthma, COPD stage III or IV, respiratory failure with continuous oxygen therapy), chronic heart failure (New York Heart Association class  $\geq \text{III}$ ), severe cognitive disorder, or immunodepression (primary immunodeficiency, uncontrolled HIV infection, immunosuppressive drug, chemotherapy). B: Inappropriate dwelling (homeless, frail relative at home, long-term care institution), lack of support person (family member or friend), or home follow-up impossible.

**Supplementary Table S2.** 4C Mortality Score composition, adapted from Knight S.R. et al. [8].

| Variable                                    | N. points |
|---------------------------------------------|-----------|
| Age, years                                  |           |
| <50                                         | 0         |
| 50-59                                       | 2         |
| 60-69                                       | 4         |
| 70-79                                       | 6         |
| ≥80                                         | 7         |
| Sex                                         |           |
| Female                                      | 0         |
| Male                                        | 1         |
| N. of comorbidities*                        |           |
| 0                                           | 0         |
| 1                                           | 1         |
| ≥2                                          | 2         |
| Respiratory rate, breaths/min               |           |
| <20                                         | 0         |
| 20-29                                       | 1         |
| ≥30                                         | 2         |
| Peripheral oxygen saturation<br>on room air |           |
| ≥92%                                        | 0         |
| <92%                                        | 2         |
| Glasgow Coma Scale                          |           |
| =15                                         | 0         |
| <15                                         | 2         |
| Urea, mmol/L                                |           |
| <7                                          | 0         |
| 7-14                                        | 1         |
| >14                                         | 3         |
| OR                                          |           |
| Creatinine^ mg/dL                           |           |
| <0.97                                       | 0         |
| 0.97-1.69                                   | 1         |
| >1.69                                       | 3         |
| C-reactive protein, mg/L (mg/dL)            |           |
| <50 (5)                                     | 0         |
| 50-99 (5-9.9)                               | 1         |
| ≥100 (10)                                   | 2         |

\*per Charlson comorbidity index: chronic cardiac disease, chronic respiratory disease, chronic renal disease (eGFR ≤30 ml/min), mild to severe liver disease, dementia, chronic neurological conditions, diabetes mellitus.

^For centers lacking urea assay.

**Supplementary Table S3.** Cross-tabulation of LUS data and 30-day clinical outcomes.

|                      | <b>Primary<br/>composite<br/>outcome</b> | <b>Secondary<br/>composite outcome</b> | Subsequent<br>ED visit | Hospital<br>admission | Supplemental<br>O <sub>2</sub> | NIV          | Death       |
|----------------------|------------------------------------------|----------------------------------------|------------------------|-----------------------|--------------------------------|--------------|-------------|
| All patients (n=393) | 35<br>(8.9%)                             | 14<br>(3.6%)                           | 48<br>(12.2%)          | 35<br>(8.9%)          | 32<br>(8.1%)                   | 10<br>(2.5%) | 2<br>(0.5%) |
| LUS modified score   |                                          |                                        |                        |                       |                                |              |             |
| 0 (n=234)            | 7<br>(3.0%)                              | 2<br>(0.9%)                            | 14<br>(6.0%)           | 7<br>(3.0%)           | 6<br>(2.6%)                    | 2<br>(0.9%)  | 0<br>(0%)   |
| 1 (n=40)             | 2<br>(5.0%)                              | 1<br>(2.5%)                            | 3<br>(7.5%)            | 2<br>(5.0%)           | 2<br>(5.0%)                    | 1<br>(2.5%)  | 0<br>(0%)   |
| 2 (n=62)             | 11<br>(17.7%)                            | 2<br>(3.2%)                            | 12<br>(19.4%)          | 11<br>(17.7%)         | 11<br>(17.7%)                  | 2<br>(3.2%)  | 1<br>(1.6%) |
| 3 (n=15)             | 6<br>(40.0%)                             | 3<br>(20.0%)                           | 8<br>(53.3%)           | 6<br>(40.0%)          | 4<br>(26.7%)                   | 1<br>(6.7%)  | 0<br>(0%)   |
| 4 (n=27)             | 6<br>(22.2%)                             | 5<br>(18.5%)                           | 7<br>(25.9%)           | 6<br>(22.2%)          | 6<br>(22.2%)                   | 3<br>(11.1%) | 1<br>(3.7%) |
| ≥5 (n=15)            | 3<br>(20.0%)                             | 1<br>(6.7%)                            | 4<br>(26.7%)           | 3<br>(20.0%)          | 3<br>(20.0%)                   | 1<br>(6.7%)  | 0<br>(0%)   |

% values refer to the number of patients in the corresponding risk-category.

**Supplementary Table S4.** Cross-tabulation of HOME-CoV/4CMS classification and 30-day clinical outcomes.

|                                     | <b>Primary<br/>composite<br/>outcome</b> | <b>Secondary<br/>composite<br/>outcome</b> | Subsequent<br>ED visit | Hospital<br>admission | Supplemental<br>O <sub>2</sub> | NIV          | Death       |
|-------------------------------------|------------------------------------------|--------------------------------------------|------------------------|-----------------------|--------------------------------|--------------|-------------|
| All patients (n=393)                | 35<br>(8.9%)                             | 14<br>(3.6%)                               | 48<br>(12.2%)          | 35<br>(8.9%)          | 32<br>(8.1%)                   | 10<br>(2.5%) | 2<br>(0.5%) |
|                                     |                                          |                                            |                        |                       |                                |              |             |
| HOME-CoV negative (n=273)           | 16<br>(5.9%)                             | 6<br>(2.2%)                                | 24<br>(8.8%)           | 16<br>(5.9%)          | 14<br>(5.1%)                   | 4<br>(1.5%)  | 0<br>(0%)   |
| HOME-CoV positive (n=120)           | 19<br>(15.8%)                            | 8<br>(6.7%)                                | 24<br>(20%)            | 19<br>(15.8%)         | 18<br>(15.0%)                  | 6<br>(5.0%)  | 2<br>(1.7%) |
|                                     |                                          |                                            |                        |                       |                                |              |             |
| 4CMS 0-3 (low risk, n=243)          | 8<br>(3.3%)                              | 2<br>(0.8%)                                | 18<br>(7.4%)           | 8<br>(3.3%)           | 7<br>(2.9%)                    | 2<br>(0.8%)  | 0<br>(0%)   |
| 4CMS 4-8 (intermediate risk, n=120) | 19<br>(15.8%)                            | 10<br>(8.3%)                               | 22<br>(18.3%)          | 19<br>(15.8%)         | 19<br>(15.8%)                  | 7<br>(5.8%)  | 1<br>(0.8%) |
| 4CMS ≥9 (high risk, n=30)           | 8<br>(26.7%)                             | 2<br>(6.7%)                                | 8<br>(26.7%)           | 8<br>(26.7%)          | 6<br>(20.0%)                   | 1<br>(3.3%)  | 1<br>(3.3%) |

% values refer to the number of patients in the corresponding risk-category.

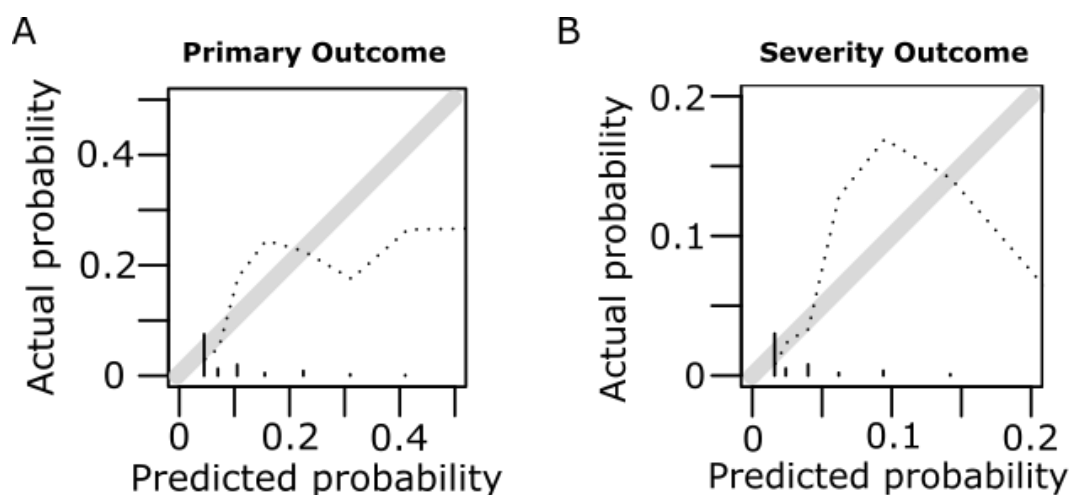

**Supplementary Figure S1.** Calibration plots of LUS for (A) the primary outcome and (B) secondary outcome.

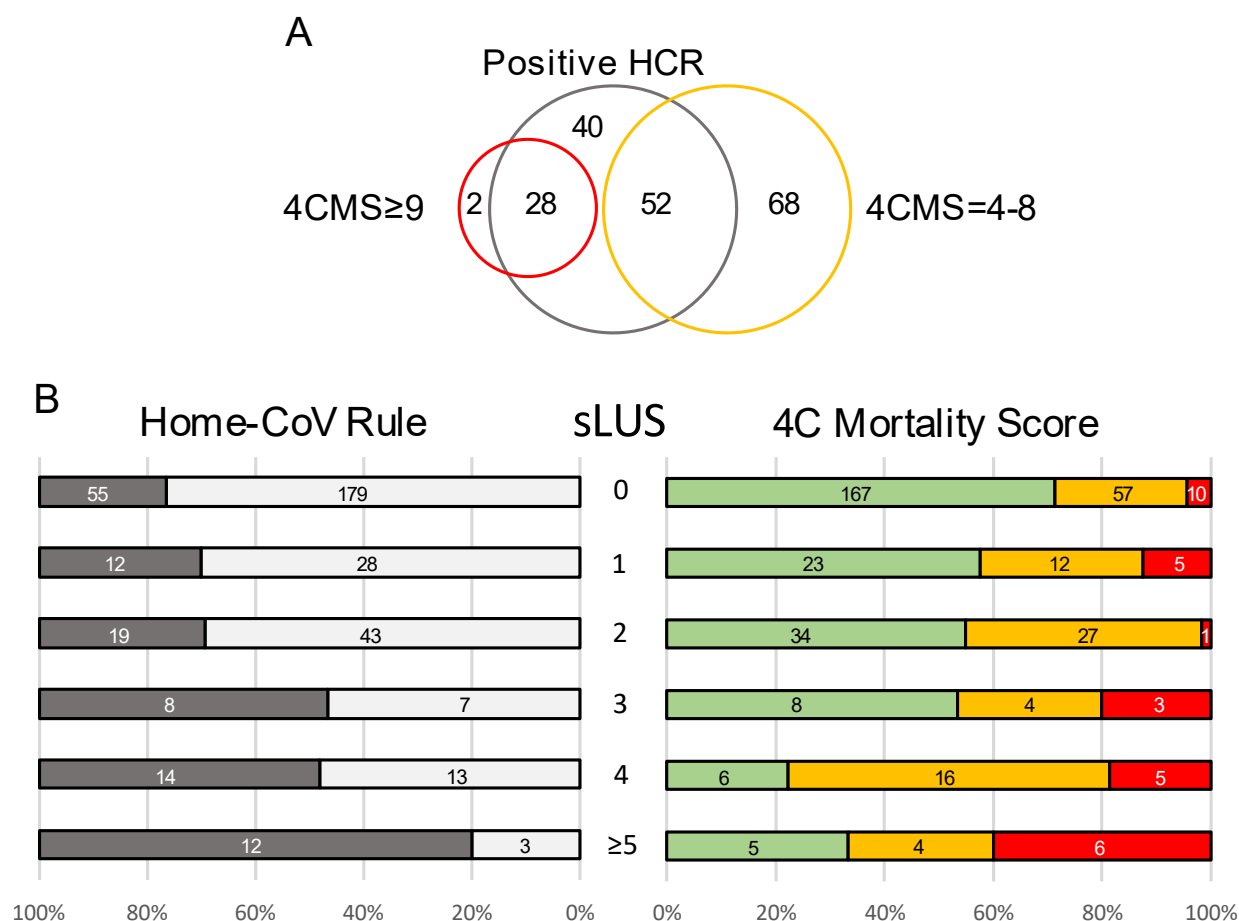

**Supplementary Figure S2.** Overlap of HCR, 4CMS and LUS results in study patients. (A) Venn's diagram. (B) Clinical and LUS classification. Green: low-risk (4CMS 0-3); yellow: intermediate-risk (4CMS 4-8); red: high-risk (4CMS  $\geq$ 9).
